# Supplementary material
Source: publisher site journal article supplement (https://www.dovepress.com/article/599377)
Supplement: Supplementary file 1 [file 599377%20Supplementary%20Material.doc]

**Table S1. Detailed cognitive behavioral therapy for insomnia (CBT-I) procedures**

| **SESSION** | **Main Intervention** | **Measure** |
| --- | --- | --- |
| **Week (-1)** | Baseline assessments  Treatment introduction | ISI, BDI, BAI, FFS, DBAS, sleep diary, actigraphy |
| **Week 1** | SCT+SRT+SH+RT | ISI, sleep diary, actigraphy |
| **Week2** | SCT+SRT+SH+RT | ISI, sleep diary, actigraphy |
| **Week3** | CT(part1)+SCT+SRT+RT+Paradoxical intention | ISI, sleep diary, actigraphy |
| **Week4** | CT(part2)+SCT+SRT+RT | ISI, sleep diary, actigraphy |
| **Week5** | Final review and avoiding relapse  Post-treatment assessments | ISI, BDI, BAI, FFS, DBAS, sleep diary, actigraphy |

Notes: SCT, stimulus control therapy; SRT, sleep restriction therapy; SH, sleep hygiene; RT, relaxation therapy; CT, cognitive therapy; ISI, Insomnia Severity Index; BDI, Beck Depression Inventory; BAI, Beck Anxiety Inventory; FFS, Flinders Fatigue Scale; DBAS, Dysfunctional Beliefs and Attitudes about Sleep Scale.

Follow-up assessments were conducted using the Pittsburgh Sleep Quality Index (PSQI).

**Table S2. Sleep diary vs. Actigraphy sleep parameters at baseline and Week 2**

|  | **Subjective**  **(Sleep Diary)** | **Objective (Actigraphy)** | **Difference**  **(Actigraphy−Diary)** |
| --- | --- | --- | --- |
| **Baseline TST (min),**  **M (P25, P75)** | 369.3 (308.4, 417.1) | 414.4 (384.8, 450.1) | 45.2 (0.8, 101.1) |
| **Baseline SE (%),**  **M (P25, P75)** | 75.5 (64.8, 83.6) | 84.0 (80.0, 87.6) | 8.5 (0.3, 19.5) |
| **Baseline SOL (min), M (P25, P75)** | 42.0 (27.1, 65.4) | 14.2 (8.6, 24.2) | -24.2 (-46.9, -9.8) |
| **Baseline TIB (min),**  **M (P25, P75)** | 494.2 (461.4, 531.2) | 498.8 (466.9, 532.1) | 3.7 (-9.6, 17.1) |
| **Week 2 TST (min),**  **M (P25, P75)** | 323.6 (284.3, 360.9) | 343.7 (314.7, 370.9) | 18.1 (-11.7, 49.9) |
| **Week 2 SE (%),**  **M (P25, P75)** | 27.1 (17.3, 42.1) | 86.6 (82.6, 89.9) | 3.2 (-3.3, 10.8) |
| **Week 2 SOL (min),**  **M (P25, P75)** | 83.5 (75.3, 89.5) | 6.7 (3.9, 12.1) | -17.8 (-31.9, -9.1) |
| **Week 2 TIB (min),**  **M (P25, P75)** | 390.3 (361.0, 422.2) | 397.9 (370.6, 427.8) | 3.4 (-4.3, 14.5) |

Note: TST, total sleep time; SE, sleep efficiency; SOL, sleep onset latency; TIB, time in bed.


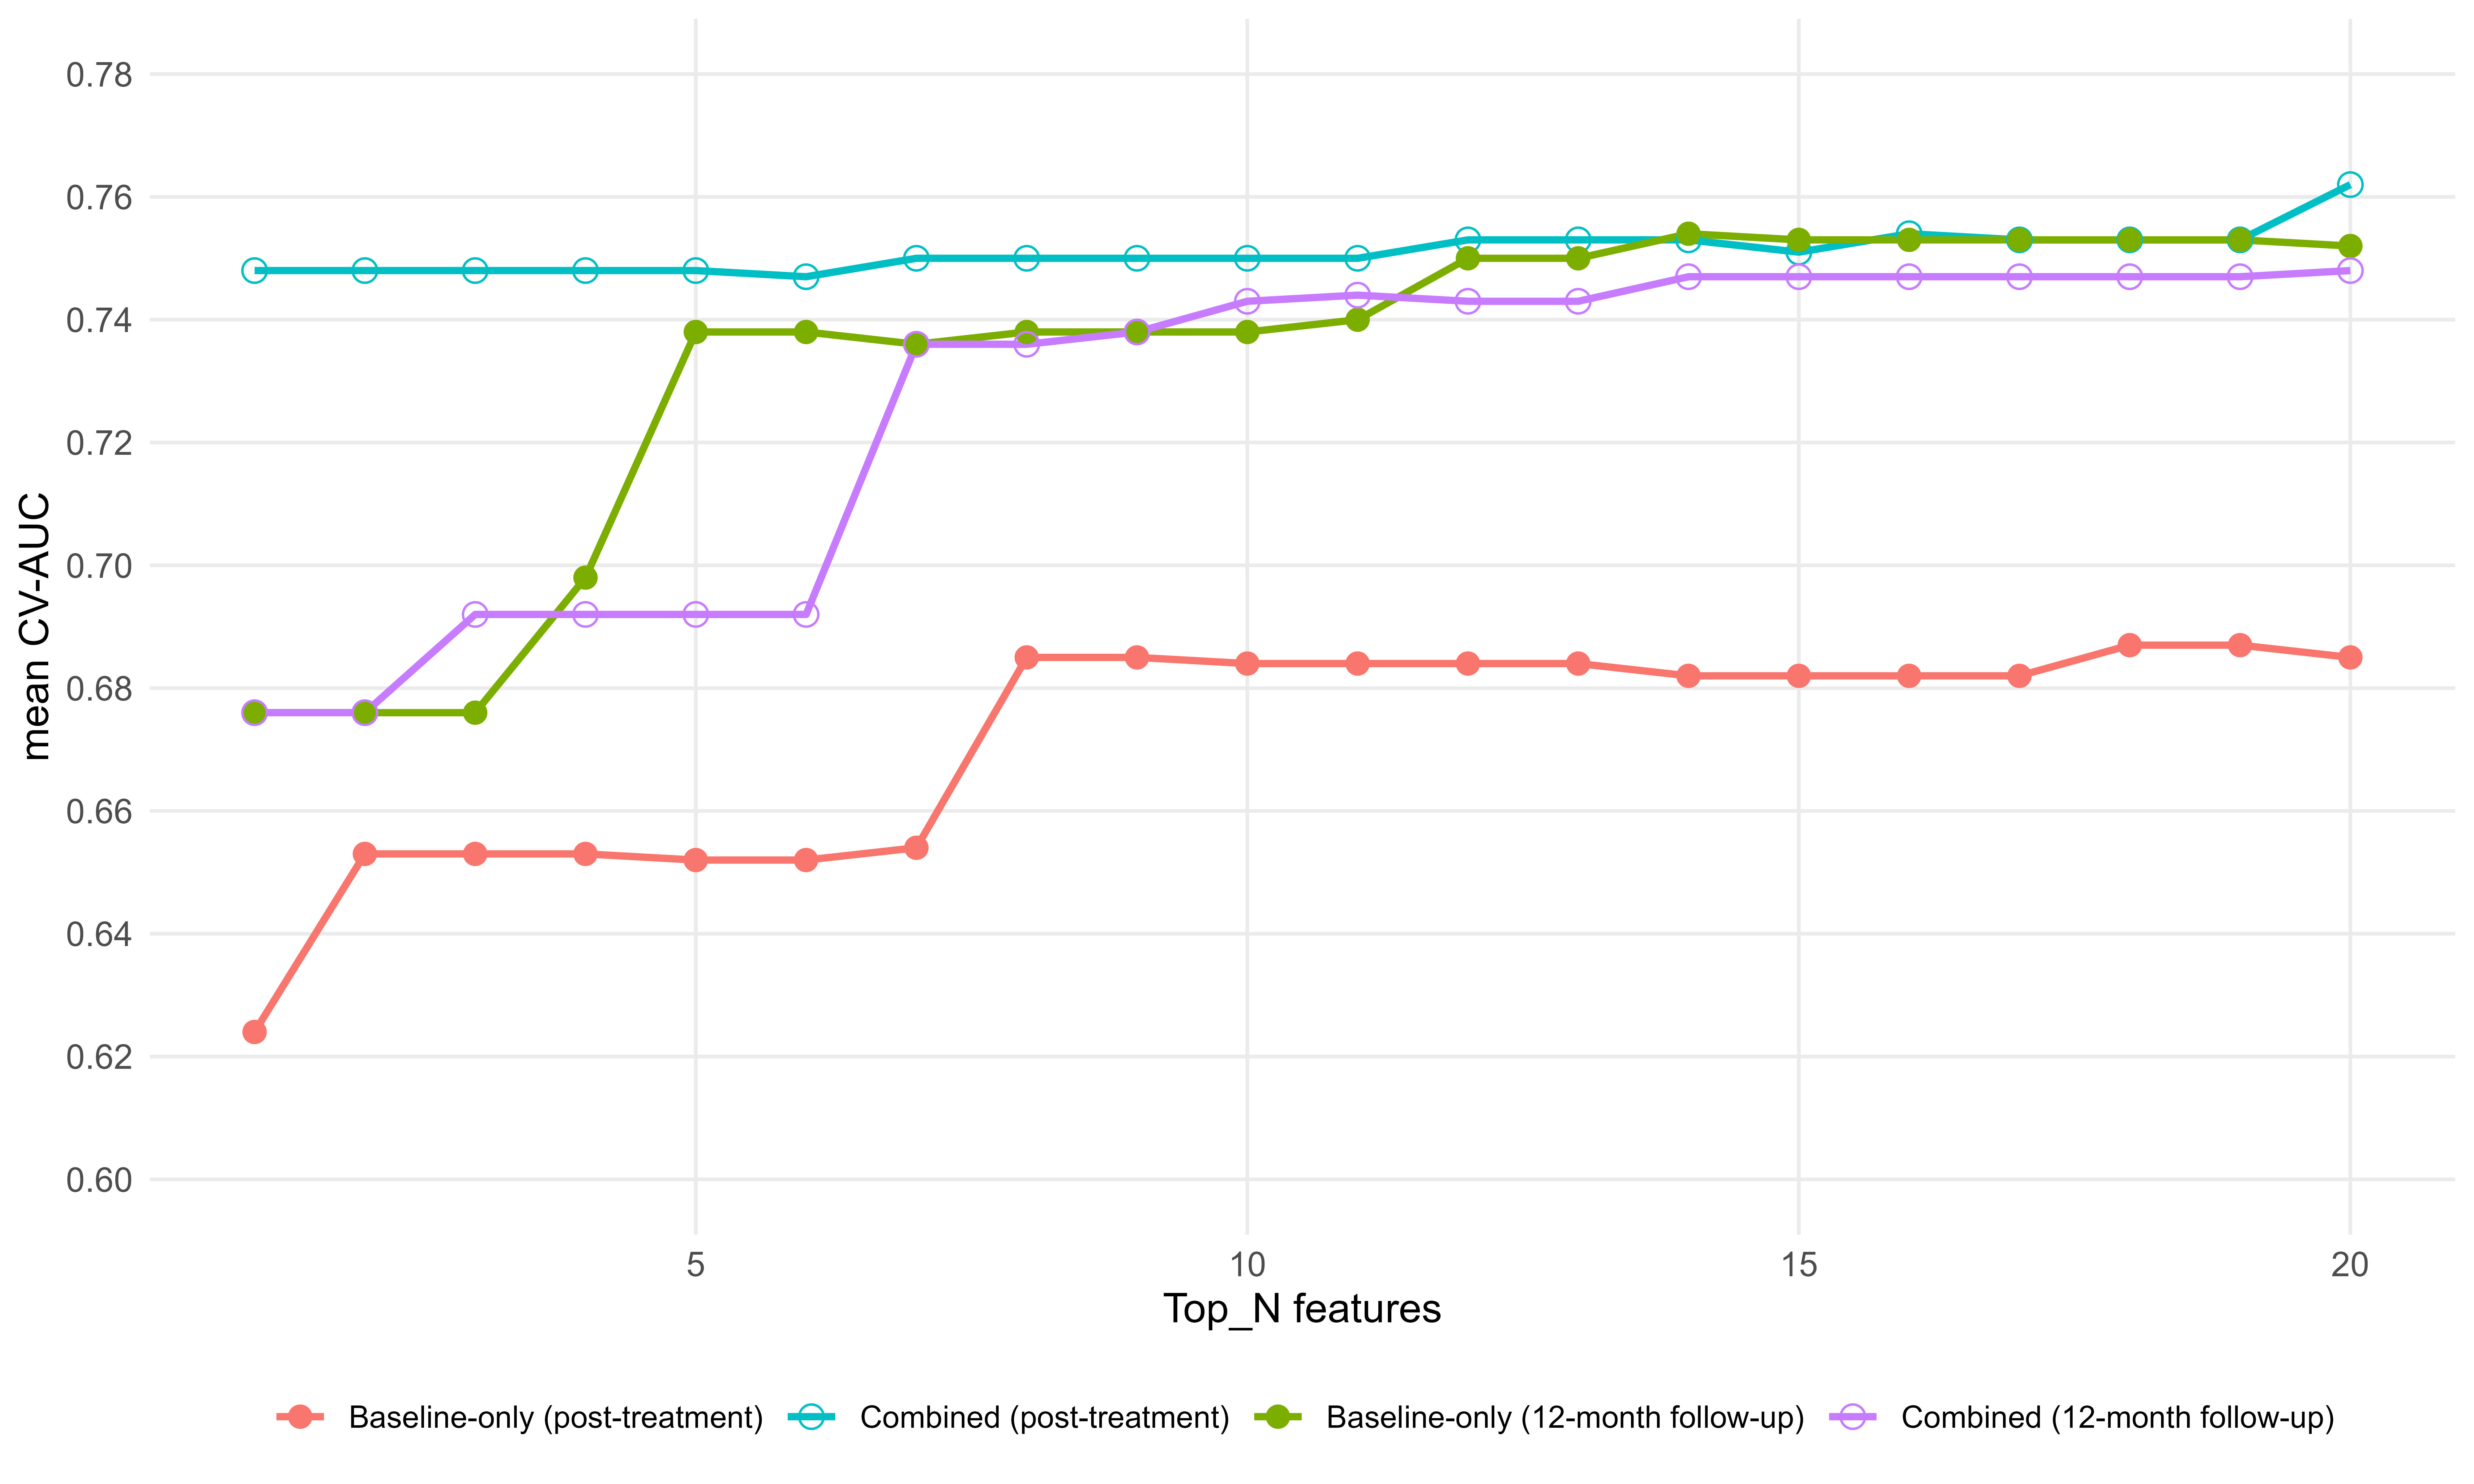


**Figure S1. Sensitivity analysis for determining the optimal number of consensus features**

The x-axis represents the number of top-ranked features (N) considered from each algorithm to derive consensus features, and the y-axis represents the mean CV-AUC. The optimal N was selected as the smallest number at which the AUC reached a plateau. This occurred at N = 8 for the baseline-only post-treatment model, N = 12 for the combined post-treatment model, N = 5 for the baseline-only 12-month follow-up model, and N = 11 for the combined 12-month follow-up model.

Note: CV-AUC = cross-validated area under the curve
